1 **Title**

2 Intrinsic apoptosis is evolutionary divergent among metazoans

3

4 **Authors**

5 Gabriel Krasovec <sup>1,2,3\*</sup>, Éric Quéinnec <sup>1\*\*</sup>, Jean-Philippe Chambon <sup>2,4\*\*</sup>

6

7 \* Authors for correspondence: GK, [gabriel.krasovec@nuigalway.ie](mailto:gabriel.krasovec@nuigalway.ie).

8 \*\* These authors contributed equally to this work.

9

10 **Affiliations**

11 <sup>1</sup>ISYEB, Institut de Systématique, Evolution et Biodiversité, Sorbonne Université, CNRS, MNHN,  
12 F-75252 Paris Cedex 05, France.

13 <sup>2</sup>Sorbonne Université, CNRS, Institut de Biologie Paris Seine, IBPS, Evolution Paris Seine, F-  
14 75252 Paris Cedex 05, France.

15 <sup>3</sup>Centre for Chromosome Biology, School of Natural Sciences, National University of Ireland  
16 Galway, Galway, Ireland.

17 <sup>4</sup>Centre de Recherche de Biologie Cellulaire de Montpellier (CRBM), Montpellier Univ., CNRS,  
18 34000 Montpellier, France.

19

## 20 **Summary**

21 Apoptosis is characterised by an analogous set of morphological features<sup>1</sup> that depend on a  
22 proteolytic multigenic family, the caspases<sup>2,3</sup>. Each apoptotic signalling pathway involves a  
23 specific initiator caspase, upstream of the pathway regulation, which finally converges to  
24 common executioner caspases. Intrinsic apoptosis, previously known as the mitochondrial  
25 apoptotic pathway, is often considered as ancestral and evolutionary conserved among  
26 animals<sup>2,4-8</sup>. First identified in the nematode *Caenorhabditis elegans*, intrinsic apoptosis was  
27 next characterised in fruit fly *Drosophila melanogaster* and mammals. Intrinsic apoptosis  
28 depends on the key initiator caspase-9 (named Ced-3 and Dronc in *Caenorhabditis* and  
29 *Drosophila*, respectively), the activator Apaf-1 and the Bcl-2 multigenic family<sup>2,6,9</sup>. Many  
30 functional studies have led to a deep characterisation of intrinsic apoptosis based on those  
31 classical models. Nevertheless, the biochemical role of mitochondria, the pivotal function of  
32 cytochrome c and the modality of caspases activation remain highly heterogeneous and hide  
33 profound molecular divergences among apoptotic pathways in animals<sup>8,10</sup>. Independent of  
34 functional approaches, the phylogenetic history of the signal transduction actors, mostly the  
35 caspase family, is the Rosetta Stone to shed light on intrinsic apoptosis evolution. Here, after  
36 exhaustive research on CARD-caspases, we demonstrate by phylogenetic analysis that the  
37 caspase-9, the fundamental key of intrinsic apoptosis, is deuterostomes-specific, while it is the  
38 caspase-2 which is ancestral and common to bilaterians. Our analysis of Bcl-2 family and Apaf-  
39 1 confirm the high heterogeneity in apoptotic pathways elaboration in animals. Taken  
40 together, our results support convergent emergence of distinct intrinsic apoptotic pathways  
41 during metazoan evolution.

42

## 43 **Keywords**

44 Intrinsic apoptosis, initiator CARD-caspase, apoptotic network evolution, phylogeny

45

## 46 **RESULTS AND DISCUSSION**

47 Apoptosis, a regulated cell death, occurs during metazoan development, tissue  
48 homeostasis and regeneration<sup>11-13</sup>. Pioneering works in *Caenorhabditis* established a  
49 molecular network of apoptosis decision, execution, and engulfment-degradation<sup>2,4,14</sup>. Next,  
50 investigation of apoptotic cascade key components from *Drosophila* and mammals imposed  
51 the paradigm that the intrinsic apoptotic “molecular program” is conserved throughout  
52 animal evolution<sup>2,4-7</sup>. However, recent researches revealed evolutionary divergences between  
53 these models, with major functional implications<sup>15,16</sup>. Based on evolutionarily conserved or  
54 divergent features of the cell death machinery among metazoans, we investigated the  
55 evolutionary history of several major actors of intrinsic apoptosis. We conducted exhaustive  
56 research of Apaf-1 and extensive phylogenetic analyses of initiator CARD-caspases and Bcl-2  
57 multigenic family proteins from major animal phyla and describe their evolutionary patterns.  
58 It is apparent that in spite of common functional similarities, each actor of these pathways has  
59 a distinct evolutionary history that led us to consider the structural and functional organisation  
60 of intrinsic apoptotic components as the result of evolutionary convergence among animals.  
61 Thus, the three animal models (nematode, fly, mouse) which were used to elaborate a unified  
62 concept of intrinsic apoptosis machinery, not only present major functional divergences, but  
63 are markedly distinct in their protein architecture, whose origin and evolutionary history  
64 followed very different molecular pathways.

65

66 **Initiator caspases of the intrinsic apoptosis pathways are not homologous**

67 Initiation and execution of apoptotic signalling pathways are fundamentally linked to  
68 the complex diversification of the caspases multigenic family, having a widely extended  
69 repertoire encompassing all metazoan phyla<sup>17–20</sup>.

70 Caspases are a class of proteases composed of three protein domains; the pro-domain,  
71 the small P10, and the large P20<sup>9,21</sup>. Initiator caspases, specific to an apoptotic pathway, have  
72 a specific Caspase Recruiting Domain (CARD) pro-domain or two Death Effector Domains  
73 (DED) pro-domains. The two distinct intrinsic and extrinsic apoptosis involve specifically the  
74 caspase-9 (CARD pro-domain) and the caspases-8-10 (DED pro-domains), respectively. Both  
75 pathways converge on common executioner caspases activation, triggering apoptosis  
76 execution<sup>2,3</sup>.

77 Due to the pivotal role of caspase-9 as initiator in intrinsic apoptosis, our main analyses  
78 focused on CARD-caspases. We confirmed their distribution in most animal phyla and  
79 reconstructed their phylogenetic relationships (Figure 1, Table S1). Regardless of the  
80 phylogenetic methodology used for the analysis, three strongly supported (PP> 0.99)  
81 monophyletic groups were identified: caspase-9, caspase-2 and a more heterogeneous group  
82 named here [Inflammatory Caspases + Caspase-Y], respectively. Although relationships  
83 among these three clades differ depending on the methodology employed, their monophyly  
84 remains robust and together they form a clade strictly corresponding to bilaterian animals (PP  
85 = 0.87; BS>90), while the sequences of [Cnidaria + Ctenophora + Placozoa] form a divergent  
86 paraphyletic group named Caspase-X (Figure 1, Supplementary Figure 1).

87 Caspase-2 appears to be widely distributed among bilaterians and topology of the gene  
88 is congruent with the three major groups of eumetazoan [Deuterostomia + Ecdysozoa +  
89 Lophotrochozoa/Spiralia], reflecting an ancestral origin in bilaterians. However caspase-9 is  
90 restricted to deuterostome animals. Conversely, the clade [Caspase-Y + Inflammatory

91 Caspase] appears to be restricted to [Vertebrata and Lophotrochozoa]. The robustness of the  
92 deutostomes-specific caspase-9 clade was explored (Supplementary Figure 2), and its strict  
93 diversification among [Vertebrata + Cephalochordata + Echinodermata + Hemichordata] was  
94 confirmed (the relative position of the cephalochordate *Branchiostoma belcheri* 9A  
95 paralogous gene remains unstable). However, consistent with previous studies on the ascidian  
96 *Ciona intestinalis*<sup>22</sup>, the five representatives of ascidian genomes studied are devoid of any  
97 caspase-9, probably confirming the loss of this gene in urochordates, the sister-group of  
98 vertebrates<sup>23</sup>. Within bilaterians, the clade-specific acquisition of caspase-9 is a major event,  
99 probably leading to the specific functionalities observed in mammals, such as the  
100 mitochondrial outer membrane permeabilisation (MOMP) allowing cytochrome c release.

101 Unexpectedly, *Drosophila* Dronc and *Caenorhabditis* Ced-3 are distinctly identified as  
102 orthologous to caspase-2 of vertebrates, and not to caspase-9, as was previously reported and  
103 largely accepted<sup>2,6</sup>. All Dronc/Ced3 proteins of insects, horseshoe crab (Xiphosura), and  
104 nematodes form a well-defined, strongly supported (PP = 1), monophyletic clade showing only  
105 one orthologous gene per species (except horseshoe crab). Thus, the caspase-2 clade of  
106 ecdysozoans is the sister group of caspase-2 of [Lophotrochozoa + Deuterostomia]. The  
107 absence of identifiable caspase-2 in echinoderms or hemichordates can probably be  
108 interpreted as a specific loss in the latter group (i.e. Ambulacraria).

109 Taken globally, our analysis shown that the usually considered conserved and ancestral  
110 initiator caspases of intrinsic apoptosis are not orthologs but divergent.

111

## 112 **The caspase activation regulator apoptosome is highly divergent in metazoans**

113 In intrinsic apoptosis, initiator caspase activation depends on their recruitment by a  
114 pivotal and considered shared component, the apoptosome platform<sup>2,15</sup>. Apoptosome

115 formation relies on critical protein interactions which are *Caenorhabditis* Ced-4, *Drosophila*  
116 Dark, and human Apaf-1 with their respective initiator caspases, Ced-3, Dronk, and  
117 procaspase-9<sup>15</sup>. CARD and other protein domains (NOD, arm) are highly conserved in Apaf-1,  
118 Dark and Ced-4<sup>24–26</sup>. However, excepted the majority of nematode species<sup>16</sup>, Apaf-1 possesses  
119 WD40 repeats at its C-terminus to bind to the cytochrome c. This binding is required in  
120 mammals for Apaf-1 oligomerisation and apoptosome formation<sup>26,27</sup>, while Ced-4 and Dark do  
121 not require cytochrome c for their assembly into an apoptosome<sup>15,28</sup>. Taken with major  
122 structural and regulating assembly differences between the octameric Dark, tetrameric Ced-  
123 4 and heptameric Apaf-1 apoptosomes, it reveal evolutionary divergences between animal  
124 apoptosomes formation and procaspases activation mechanisms, probably differentially  
125 modulating the cell death execution pathway<sup>29</sup>.

126 Here we conducted exhaustive analysis by reciprocal BLAST and phylogenetic analyses  
127 of Apaf-1 homologs (data not show) and confirmed its ubiquity in the majority of metazoan  
128 phyla (Table S2). Remarkably, Apaf-1 orthologs were absent from all urochordates and  
129 molluscs in accordance with previous work<sup>22,25,30–33</sup>, and from *Capitella teleta* (Annelida),  
130 suggesting independent losses in those animals or, a less parsimonious hypothesis, multiple  
131 independent evolution of modular proteins from the common ancestor of metazoans<sup>25</sup>  
132 (Figure 2). In non-bilaterians, Apaf-1 gene family has not been found in *Pleurobrachia pileus*  
133 genome (Ctenophora), but seems present in other early diverging metazoan phyla [Porifera,  
134 Cnidaria and Placozoa] (<sup>25,34,35</sup>, our data). However, their CARD domains were highly divergent  
135 from caspase-9 domains of vertebrates and comparative analysis revealed unrelated complex  
136 apoptosis networks.

137 Importantly, analyses from several genomes (cnidarian, nematode, fly, amphioxus, sea  
138 urchin, human) clearly identified three well-defined independent clades of paralogous genes

139 among metazoans, highlighting that Ced-4, Dark and Apaf-1 are not homologous between  
140 ecdysozoans and vertebrates<sup>25</sup>. The divergent evolution history of structural actors of the  
141 apoptosome platforms confirm functional analyses carried out so far suggesting that caspase  
142 structure and interaction differs among taxa and clades<sup>16</sup>.

143 Despite its fundamental role in the apoptotic cell death pathways and also in non-  
144 apoptotic functions<sup>36–38</sup>, diverse metazoan phyla have independently experienced adapter  
145 protein Apaf-1 ortholog losses or independent molecular evolution. Consequently, the  
146 modality of apoptosome formation and the subsequent caspases activation are convergent  
147 among metazoan, and the similar mechanisms observed are hypothesised to be related to  
148 relaxation of functional constrains on molecular Apaf-1-like molecules oligomerisation  
149 process.

150 Finally, in-depth analysis of apoptosome structure argues in favour of distinct  
151 evolutionary origins, most likely modulated by functional interactions involving distinct  
152 initiator caspases.

153

#### 154 **The regulation of apoptosis by the Bcl-2 family is convergent among metazoans**

155 Intrinsic apoptosis is ultimately regulated by the Bcl-2 proteins, composed of several  
156 Bcl-2 homologous (BH) domains<sup>39,40</sup>. In mammals, the balance between pro-survival (four  
157 BH1-BH4 domains) and pro-apoptotic proteins (Bax/Bak/Bok and BH3-only) of the Bcl-2  
158 controls initiation of intrinsic apoptosis. Conformational changes of the three-dimensional  
159 structures and interactions between Bcl-2 actors enables the assembly of pore-like structures  
160 controlling MOMP<sup>41</sup>.

161 Multiple sequence alignments of metazoan Bcl-2 family proteins (Supplementary  
162 Figure 3, Table S3) (but with over-represented chordates reflective of greater availability of

163 vertebrate genomes) confirm the distribution of Bcl-2 in Metazoa<sup>16,24,40,42</sup>. Consistent with  
164 functional Bcl-2 classification, proteins clustered into five monophyletic groups (i.e. three ‘pro-  
165 apoptotic’ clades: Bok, Bak, Bax and two less supported pro-survival - ‘anti-apoptotic’ groups:  
166 Bcl-2/W/XL and a more complex Bcl-B / Mcl-1 / Bfl-1 clade) (Supplementary Figure 3).  
167 However, respective relationships among each of these well-supported groups were not  
168 clearly resolved, and some divergent or less characterised sequences from molluscs such as  
169 *Biomphalaria glabrata* (Bcl-like2, Bcl-like3), from the cnidarian *Hydra vulgaris* (Bcl-like1) or  
170 from the urochordate *Ciona intestinalis* (Bcl-like1) were not strictly attributed to a particular  
171 class.

172 *Caenorhabditis* is deprived of pro-apoptotic Bcl-2 and possesses only the pro-survival  
173 Ced-9 (orthologous to vertebrates Bcl-2/w/xl), and two BH-3 only proteins (Egl-1 and Ced-13).  
174 Conversely, only two pro-apoptotic Bok-like close paralogs (Debcl and Buffy) were present in  
175 *Drosophila* (Figure 2, Supplementary Figure 3), but their functions remains unclear<sup>43</sup>. In both  
176 animals, there is no MOMP and apoptosome assembly does not require cytochrome c  
177 binding<sup>44</sup>. Presence of both anti- and pro-apoptotic Bcl-2 in molluscs underlines the divergent  
178 particularities observed inside Protostomia. Contrarily, similarities of Bcl-2 family composition  
179 are observed within some deuterostomes (mammals and echinoderms).

180 Finally, if multiple Bcl-2 genes were acquired early in metazoan evolution, and despite  
181 conservation of almost homologous genes, key differences accumulate, making initiation  
182 mechanisms in intrinsic apoptotic signalling pathways convergent among animals.

183

#### 184 **Apoptotic mitochondrial pathways are convergent among metazoans**

185 Functional evidences emphasise that caspase-2 members play a critical role in various  
186 cell deaths, but have independently involved in a range of non-apoptotic functions, including



187 cell cycle regulation, DNA repair and tumour suppression<sup>45–48</sup>. This implication of caspase-2 in  
188 a myriad of signalling pathways and interaction with a panel of adaptor molecules  
189 demonstrates its functional versatility<sup>45,46,49–52</sup>. As previously reported and unlike other  
190 initiator caspases studied, our phylogenetic analyses corroborate the wide distribution of  
191 caspase-2 in bilaterians and suggest its ancestral multifunctionality.

192         The major structural and functional similarities that led to an erroneous interpretation  
193 of the phylogenetic position of Ced-3 and Dronc underlines a probable common evolutionary  
194 origin of caspase-2 and -9 genes. We propose here that caspase-9 originates from  
195 deuterostome-specific duplication of a caspase-2-like gene, followed by functional  
196 specialisation of paralogs. In the case of vertebrates (and probably in Cephalochordates), the  
197 two families of paralogs have been preserved. Caspase-2 retains multifunctional activity, and  
198 in mammals can interact with PIDDosome platform containing P53, adapter molecules RAIDD,  
199 and signalling complex DISC, activating both extrinsic, intrinsic, and DNA damage  
200 pathways<sup>51,53–55</sup>. Conversely, the caspase-9 gene underwent a functional divergence in  
201 connection with its specialisation in allosteric interactions with the apoptosome<sup>3</sup>.

202         Due to its pivotal role as a mediator of genomic stability through involvement in cell  
203 proliferation, oxidative stress, aging and cell death, the molecular divergence of the caspase-  
204 2 gene is highly constrained during evolution, probably because destabilisation of any  
205 signalling cascade is sufficient to initiate tumorigenesis. Therefore, purifying selection is likely  
206 important during caspase-2 evolution, except during the radiation of deuterostomes, when it  
207 could have been relaxed due to the duplication and the modification of the functionalisation  
208 of caspase duplicates (cf. Duplication-Degeneration-Complementation model)<sup>56–58</sup>. This  
209 model could explain the loss of caspase-9 concomitantly with a caspase-2 duplication in  
210 urochordates (Figure 1, Supplementary Figure 2). Similarly, orthologs of caspase-2 have been

211 lost, or strongly diverged, while caspase-9 orthologs present a *de novo* relative expansion in  
212 *Strongylocentrotus purpuratus* (Echinodermata) and *Saccoglossus kowalevskii*  
213 (Hemichordata).

214 Due to generalised gene losses in ecdysozoans and in comparison with other  
215 bilaterians, *Caenorhabditis* and *Drosophila* apoptotic pathways are generally considered  
216 simpler than those of vertebrates<sup>9,10</sup>. However, what distinguishes ecdysozoans from  
217 lophotrochozoans (molluscs, annelids, and their relatives) and deuterostomes is not only a  
218 smaller number of genes but also above all the shape of pathways organised around different  
219 paralogous genes. The absence of orthologous relationships among genes results in a very  
220 different structural organisation of platforms but also generates important functional  
221 divergences (i.e. mechanisms of regulating assembly, CARD-CARD interactions with  
222 procaspases)<sup>15</sup>.

223 Consistent with mammalian caspase-2 functions, *Caenorhabditis* Ced-3 has both  
224 initiator as well as executioner activities but is activated by the Ced-4 platform in a specific  
225 manner<sup>8,51,59,60</sup>. Unlike the organisation of the mammal apoptosome, the *Caenorhabditis* Ced-  
226 4 platform presents neither MOMP nor the release of cytochrome *c*<sup>4,10</sup>. Due to its interaction  
227 with Dark (Apaf-1 paralog), the only CARD-caspase in *Drosophila* (Dronc) has been wrongly  
228 classified as caspase-9<sup>6,61</sup>. Likewise, involvement of Dronc in various processes such as  
229 compensatory cell proliferation, inhibition of cell migration or spermatid differentiation,  
230 brings this protein closer to the functionalities of caspase-2 clade<sup>62,63</sup>.

231 Like other protostomes, molluscs are deprived of caspase-9 but caspase-2 orthologs  
232 have been identified in bivalves and were suspected to function in “a caspase-9-like manner”<sup>64</sup>.  
233 Hence, caspase-2 is responsible for apoptotic process during larval metamorphosis in the  
234 oyster *Crassostrea gigas*, but more surprisingly, despite the absence of caspase-9 and Apaf-1

235 (and thus, of a mammalian-like apoptosome), this peculiar pathway is amazingly associated  
236 with cytochrome c release<sup>30,33,65–68</sup>. The complexity of intrinsic apoptosis in molluscs seems to  
237 be important, but divergent from what was observed in ecdysozoans or vertebrates, and more  
238 specifically shows a putative expansion of initiator and executioner caspases that participate  
239 both in immunity, stress responses, and apoptosis (Figure 2)<sup>33,64,69–72</sup>.

240 Unexpectedly, mammals present almost the unique case (with probably the  
241 cephalochordates) in which both caspase-2 and caspase-9 are conserved and involved in  
242 apoptosis. This putative functional redundancy (i.e. recruitment, autoactivation or  
243 transactivation, homodimerisation and subsequent interchain proteolytic cleavage)  
244 undoubtedly led to the functional specialisation observed for caspase-9. This appears to be  
245 fundamentally linked to the mammalian mitochondrial pathway and non-apoptotic activity  
246 most often indirectly via caspase-3 activation<sup>73–76</sup>. Finally, echinoderms seem to uniquely have  
247 an intrinsic apoptosis similar to mammals, with a caspase-9, Bcl-2, Apaf-1, and a MOMP with  
248 cytochrome c release (Figure 2)<sup>5,77</sup>.

249 Although we can envisage a weak parsimonious scenario that showcases a common  
250 ancestral apoptotic pathway in deuterostomes (but implying independent secondary losses  
251 in hemichordates, cephalocordates and urochordates), the similarities observed between  
252 echinoderms and mammals more probably reflect functional convergences based on  
253 independent recruitment of apoptotic actors.

254

## 255 **CONCLUSION**

256 The apoptotic networks of *Caenorhabditis* and *Drosophila* do not exemplify ancestral  
257 conditions from which mammalian-grade apoptotic complexity emerged but are on the

258 contrary, and as suggested recently, the result of a derived condition specific to ecdysozoans  
259 among animals<sup>24,69,78,79</sup>.

260 The core components of intrinsic apoptotic pathways, especially initiator caspases and  
261 the apoptosome platform, are not ancestral in metazoans. Our phylogenetic analyses highlight  
262 an unexpected evolutionary history: while the bilaterian caspase-2-mediated apoptotic toolkit  
263 emerged ancestrally and remains multifunctional, the caspase-9 mediator of the mammalian  
264 apoptosome is specific to deuterostomes.

265 The major functional divergences in mitochondrial apoptotic pathways observed  
266 among animals<sup>8,80-82</sup> mainly originated in the recruitment of paralogous actors from the same  
267 multigenic families reflecting the adaptive processes specific to each taxon, which lead  
268 ultimately to convergent evolutionary histories. Interestingly, this richness of the apoptotic  
269 genetic repertoire was suggested to be links to the persistence of stem cells in adults from  
270 different phyla<sup>83,84</sup>.

271 Finally, mitochondria-mediated apoptosis, like other programmed cell deaths, has  
272 likely evolved before and throughout metazoan diversification to shape developmental  
273 processes, immune response, or to adapt cellular environment to environmental constraint.

274

## 275 **RESOURCE AVAILABILITY**

### 276 **Lead contact**

277 Further information and requests should be address to the Lead Contact, Gabriel Krasovec  
278 ([gabriel.krasovec@nuigalway.ie](mailto:gabriel.krasovec@nuigalway.ie)).

279

### 280 **Materials availability**

281 Any request should be address to the Lead Contact.

282

283 **Data and code availability**

284 No code was generated during this study. Source data are available upon request.

285

286 **EXPERIMENTAL MODEL AND SUBJECT DETAILS**

287 No experimental model was used during this study.

288

289 **METHOD DETAILS**

290 **Sequences dataset construction**

291 Putative metazoans CARD-caspases were identified by using tBLASTn and BLASTp  
292 searches with human caspases (caspase-1 to 10), Ced-3, and Dronc as query on NCBI, ANISEED  
293 (ascidians), EchinoBase (*Strongylocentrotus purpuratus*), and neurobase.rc.ufl.edu  
294 (*Pleurobrachia bachei*) databases, and followed by reciprocal BLAST. After identification of  
295 CARD-caspases in target species, sequences were added as query to conduct BLAST searches  
296 in close relative (i.e. identified CARD-caspases of *Crassostrea gigas* were used as query to look  
297 for in other molluscs). Sequences with an e-value inferior to 1e-10 was retained. All identified  
298 sequences were analysed with ScanProsite (ExPaSy)<sup>85</sup> and InterProScan (EMBL-EBI)<sup>86</sup> to  
299 double check the presence of specific caspases domains. Another sequence was added to  
300 verify its identification proposed as a caspase-2 in literature: *Crassostrea angulata* casp-2<sup>68</sup>.  
301 Caspases family are short proteins (containing the large common P20 and the small P10  
302 domains) with a high number of genes per species that rapidly limits the relevance of the  
303 phylogenetic analyses. To reduce the artefact branching and unreadable topology, the dataset  
304 was built using CARD-caspase gene repertoires of selected species and in order to maximize

305 phylogenetic diversity across Metazoa. A full list of all caspase sequences is provided in Table  
306 S1.

307 Metazoan Bcl-2 were identified by using tBLASTn and BLASTp searches with human  
308 Bcl-2 as query on NCBI, are followed by reciprocal BLAST. All identified sequences were  
309 analysed with ScanProsite (ExPaSy) and InterProScan (EMBL-EBI) to double check the presence  
310 of BH domains. Because of their too short sequences, BH3-only were not taking in account. A  
311 full list of all Bcl-2 sequences is provided in Table S3.

312 Multiple alignments of protein sequences were generated using the MAFFT software  
313 version 7<sup>87</sup> with default parameters and also Clustal Omega<sup>88</sup> to verify the congruence of the  
314 different alignments. All sequences were then manually checked in BloEdit 7.2 software<sup>89</sup> to  
315 verify the presence of the specific domains previously identified. Gblocks version 0.91b<sup>90</sup> was  
316 used to remove vacancies and blur sites. Final alignments are composed of 230, 235, and 147  
317 amino acids for metazoan CARD-caspases alignment, deuterostomian CARD-caspases  
318 alignment, and metazoan Bcl-2 alignment, respectively.

319

### 320 **APAF-1 detection**

321 Identification of metazoan Apaf-1 was made by tBLASTn and BLASTp using human  
322 APAF-1, nematode Ced-4, and fly Dark as query on NCBI, ANISEED (ascidians), and  
323 neurobase.rc.ufl.edu (*Pleurobrachia bachei*) databases, and followed by reciprocal BLAST. E-  
324 value threshold was specified to be 0.1 to increase the chance of finding sequences that  
325 match. Potential resulting sequences were analyzed with ScanProsite and also InterProScan.  
326 A full list of all Apaf-1 sequences is provided in Table S2.

327

### 328 **Phylogenetic analysis**

329 Phylogenetic analyses were carried out from the amino-acid alignment by Maximum-  
330 Likelihood (ML) method using PhyML 3.1<sup>91</sup>, combined ML tree search with 1000 bootstrap  
331 replicates, and tree were visualized using Seaview<sup>92</sup>. Best amino-acid evolution model to  
332 conduct analysis were determined using MEGA11<sup>93</sup> and are WAG and LG model for CARD-  
333 caspases alignments and Bcl-2 alignment, respectively.

334 Bayesian analyses were performed using MrBayes (v3.2.6)<sup>94</sup> under mixed model. For  
335 each analysis, one fourth of the topologies were discarded as burn-in values, while the  
336 remaining ones were used to calculate the posterior probability. The run for metazoan CARD-  
337 caspases alignment was carried out for 2 000 000 generations with 15 randomly started  
338 simultaneous Markov chains (1 cold chain, 14 heated chains) and sampled every 100  
339 generations. The run for deuterostomian CARD-caspases alignment was carried out for 500  
340 000 generations with 5 randomly started simultaneous Markov chains (1 cold chain, 4 heated  
341 chains) and sampled every 100 generations. The run for metazoan Bcl-2 alignment was carried  
342 out for 5 000 000 generations with 20 randomly started simultaneous Markov chains (1 cold  
343 chain, 19 heated chains) and sampled every 100 generations.

344 ML bootstrap values higher than 50% and Bayesian posterior probabilities are indicated on the  
345 Bayesian tree (Figure 1; Supplementary Figures 2, 3)

346 For the metazoans caspase-CARD phylogeny, outgroup used is the only one caspase  
347 with a pro-domain Card of the Porifera *Amphimedon queenslandica* (XP\_003383519) (Figure  
348 1). Analyses of caspase-Card were made independently at the deuterostomes scale with four  
349 different outgroup to test their effect on the stability of the topology: *i*) caspase-Card-Y of the  
350 annelid *Capitella teleta* (ELT97848.1), *ii*) caspase-Card 2 of the mollusk *Aplysia californica*  
351 (XP\_005113266), *iii*) caspase-Card-X2 of cnidarian *Hydra vulgaris* (NP\_001274285.1) *iv*)  
352 caspase-Card Ced-3 of the ecdysozoan *Caenorhabditis elegans* (AAG42045.1) (Supplementary

353 Figure 2). For the metazoans Bcl-2 phylogenies, outgroup used to test their effect on the  
354 stability of the topology are: *i*) Bcl-2 like1 (XP\_003383425.1) and Bcl-2 like2 (XP\_003387574.1)  
355 of Porifera *Amphimedon queenslandica* (Supplementary Figure 3).

356

## 357 **ACKNOWLEDGEMENTS**

358 Authors acknowledge Sébastien Darras (Sorbonne Université, Banyuls-sur-mer),  
359 Christine Vesque (Sorbonne Université, Paris), Jérôme Gros (Institut Pasteur, Paris), Sabine  
360 Hennequin (Sorbonne Université, Paris), Uri Frank (NUIG, Galway), and Helen Horkan (NUIG,  
361 Galway) for helpful comments. GK was supported by a Ph.D. fellowship from the French  
362 Ministry of Education, Research and Innovation.

363

## 364 **AUTHOR CONTRIBUTIONS**

365 JP and EQ managed the project. GK made BLAST, phylogenetic analysis, and figures. GK  
366 and EQ wrote the manuscript.

367

## 368 **DECLARATION OF INTERESTS**

369 Authors declare no competing interests.

370

## 371 **BIBLIOGRAPHY**

- 372 1. Kerr, J.F., Wyllie, A.H., and Currie, A.R. (1972). Apoptosis: a basic biological phenomenon with  
373 wide-ranging implications in tissue kinetics. *Br. J. Cancer* 26, 239–257.
- 374 2. Hengartner, M.O. (2000). The biochemistry of apoptosis. *Nature* 407, 770–776.
- 375 3. Galluzzi, L., Vitale, I., Aaronson, S.A., Abrams, J.M., Adam, D., Agostinis, P., Alnemri, E.S., Altucci,  
376 L., Amelio, I., Andrews, D.W., et al. (2018). Molecular mechanisms of cell death:  
377 recommendations of the Nomenclature Committee on Cell Death 2018. *Cell Death Differ.* 25,  
378 486–541.



- 379 4. Lettre, G., and Hengartner, M.O. (2006). Developmental apoptosis in *C. elegans*: a complex  
380 CEDnario. *Nat Rev Mol Cell Biol* 7, 97–108.
- 381 5. Bender, C.E., Fitzgerald, P., Tait, S.W.G., Llambi, F., McStay, G.P., Tupper, D.O., Pellettieri, J.,  
382 Sánchez Alvarado, A., Salvesen, G.S., and Green, D.R. (2012). Mitochondrial pathway of apoptosis  
383 is ancestral in metazoans. *Proc. Natl. Acad. Sci. U.S.A.* 109, 4904–4909.
- 384 6. Steller, H. (2008). Regulation of apoptosis in *Drosophila*. *Cell Death Differ.* 15, 1132–1138.
- 385 7. Driscoll, M. (1996). Cell death in *C. elegans*: molecular insights into mechanisms conserved  
386 between nematodes and mammals. *Brain Pathol* 6, 411–425.
- 387 8. Fuchs, Y., and Steller, H. (2015). Live to die another way: modes of programmed cell death and  
388 the signals emanating from dying cells. *Nat. Rev. Mol. Cell Biol.* 16, 329–344.
- 389 9. S, E. (2007). Apoptosis: a review of programmed cell death. *Toxicologic pathology* 35.  
390 <https://pubmed.ncbi.nlm.nih.gov/17562483/>.
- 391 10. Meier, P., Finch, A., and Evan, G. (2000). Apoptosis in development. *Nature* 407, 796–801.
- 392 11. Jacobson, M.D., Weil, M., and Raff, M.C. (1997). Programmed cell death in animal development.  
393 *Cell* 88, 347–354.
- 394 12. Hipfner, D.R., and Cohen, S.M. (2004). Connecting proliferation and apoptosis in development  
395 and disease. *Nat Rev Mol Cell Biol* 5, 805–815.
- 396 13. Vríz, S., Reiter, S., and Galliot, B. (2014). Cell death: a program to regenerate. *Curr. Top. Dev. Biol.*  
397 108, 121–151.
- 398 14. Ellis, H.M., and Horvitz, H.R. (1986). Genetic control of programmed cell death in the nematode  
399 *C. elegans*. *Cell* 44, 817–829.
- 400 15. Dorstyn, L., Akey, C.W., and Kumar, S. (2018). New insights into apoptosome structure and  
401 function. *Cell Death Differ* 25, 1194–1208.
- 402 16. Young, N.D., Harris, T.J., Evangelista, M., Tran, S., Wouters, M.A., Soares da Costa, T.P., Kershaw,  
403 N.J., Gasser, R.B., Smith, B.J., Lee, E.F., et al. (2020). Diversity in the intrinsic apoptosis pathway  
404 of nematodes. *Commun Biol* 3, 478.
- 405 17. Bell, R.A.V., and Megeney, L.A. (2017). Evolution of caspase-mediated cell death and  
406 differentiation: twins separated at birth. *Cell Death Differ* 24, 1359–1368.
- 407 18. Shrestha, S., Tung, J., Grinshpon, R.D., Swartz, P., Hamilton, P.T., Dimos, B., Mydlarz, L., and  
408 Clark, A.C. (2020). Caspases from scleractinian coral show unique regulatory features. *J Biol*  
409 *Chem* 295, 14578–14591.
- 410 19. Uren, A.G., O'Rourke, K., Aravind, L., Pisabarro, M.T., Seshagiri, S., Koonin, E.V., and Dixit, V.M.  
411 (2000). Identification of Paracaspases and Metacaspases: Two Ancient Families of Caspase-like  
412 Proteins, One of which Plays a Key Role in MALT Lymphoma. *Molecular Cell* 6, 961–967.
- 413 20. Crawford, E.D., Seaman, J.E., Barber, A.E., David, D.C., Babbitt, P.C., Burlingame, A.L., and Wells,  
414 J.A. (2012). Conservation of caspase substrates across metazoans suggests hierarchical

- 415 importance of signaling pathways over specific targets and cleavage site motifs in apoptosis. *Cell*  
416 *Death Differ* *19*, 2040–2048.
- 417 21. Thornberry, N.A., and Lazebnik, Y. (1998). Caspases: enemies within. *Science* *281*, 1312–1316.
- 418 22. Terajima, D., Shida, K., Takada, N., Kasuya, A., Rokhsar, D., Satoh, N., Satake, M., and Wang, H.-G.  
419 (2003). Identification of candidate genes encoding the core components of the cell death  
420 machinery in the *Ciona intestinalis* genome. *Cell Death Differ.* *10*, 749–753.
- 421 23. Delsuc, F., Brinkmann, H., Chourrout, D., and Philippe, H. (2006). Tunicates and not  
422 cephalochordates are the closest living relatives of vertebrates. *Nature* *439*, 965–968.
- 423 24. Zmasek, C.M., and Godzik, A. (2013). Evolution of the animal apoptosis network. *Cold Spring*  
424 *Harb Perspect Biol* *5*, a008649.
- 425 25. Zmasek, C.M., Zhang, Q., Ye, Y., and Godzik, A. (2007). Surprising complexity of the ancestral  
426 apoptosis network. *Genome Biol.* *8*, R226.
- 427 26. Zou, H., Henzel, W.J., Liu, X., Lutschg, A., and Wang, X. (1997). Apaf-1, a human protein  
428 homologous to *C. elegans* CED-4, participates in cytochrome c-dependent activation of caspase-  
429 3. *Cell* *90*, 405–413.
- 430 27. Zou, H., Li, Y., Liu, X., and Wang, X. (1999). An APAF-1.cytochrome c multimeric complex is a  
431 functional apoptosome that activates procaspase-9. *J. Biol. Chem.* *274*, 11549–11556.
- 432 28. Dorstyn, L., Read, S., Cakouros, D., Huh, J.R., Hay, B.A., and Kumar, S. (2002). The role of  
433 cytochrome c in caspase activation in *Drosophila melanogaster* cells. *J Cell Biol* *156*, 1089–1098.
- 434 29. Shi, Y. (2006). Mechanical aspects of apoptosome assembly. *Curr Opin Cell Biol* *18*, 677–684.
- 435 30. Li, Y., Zhang, L., Qu, T., Tang, X., Li, L., and Zhang, G. (2017). Conservation and divergence of  
436 mitochondrial apoptosis pathway in the Pacific oyster, *Crassostrea gigas*. *Cell Death Dis* *8*, e2915.
- 437 31. Kiss, T. (2010). Apoptosis and its functional significance in molluscs. *Apoptosis* *15*, 313–321.
- 438 32. Romero, A., Novoa, B., and Figueras, A. (2015). The complexity of apoptotic cell death in  
439 mollusks: An update. *Fish Shellfish Immunol.* *46*, 79–87.
- 440 33. Estévez-Calvar, N., Romero, A., Figueras, A., and Novoa, B. (2013). Genes of the mitochondrial  
441 apoptotic pathway in *Mytilus galloprovincialis*. *PLoS ONE* *8*, e61502.
- 442 34. Srivastava, M., Simakov, O., Chapman, J., Fahey, B., Gauthier, M.E.A., Mitros, T., Richards, G.S.,  
443 Conaco, C., Dacre, M., Hellsten, U., et al. (2010). The *Amphimedon queenslandica* genome and  
444 the evolution of animal complexity. *Nature* *466*, 720–726.
- 445 35. Srivastava, M., Begovic, E., Chapman, J., Putnam, N.H., Hellsten, U., Kawashima, T., Kuo, A.,  
446 Mitros, T., Salamov, A., Carpenter, M.L., et al. (2008). The *Trichoplax* genome and the nature of  
447 placozoans. *Nature* *454*, 955–960.
- 448 36. Zermati, Y., Mouhamad, S., Stergiou, L., Besse, B., Galluzzi, L., Boehrer, S., Pauleau, A.-L., Rosselli,  
449 F., D’Amelio, M., Amendola, R., et al. (2007). Nonapoptotic role for Apaf-1 in the DNA damage  
450 checkpoint. *Mol Cell* *28*, 624–637.

- 451 37. Ferraro, E., Pesaresi, M.G., De Zio, D., Cencioni, M.T., Gortat, A., Cozzolino, M., Berghella, L.,  
452 Salvatore, A.M., Oettinghaus, B., Scorrano, L., et al. (2011). Apaf1 plays a pro-survival role by  
453 regulating centrosome morphology and function. *J Cell Sci* 124, 3450–3463.
- 454 38. Shakeri, R., Kheirollahi, A., and Davoodi, J. (2017). Apaf-1: Regulation and function in cell death.  
455 *Biochimie* 135, 111–125.
- 456 39. Lee, E.F., Clarke, O.B., Evangelista, M., Feng, Z., Speed, T.P., Tchoubrieva, E.B., Strasser, A.,  
457 Kalinna, B.H., Colman, P.M., and Fairlie, W.D. (2011). Discovery and molecular characterization of  
458 a Bcl-2-regulated cell death pathway in schistosomes. *Proc. Natl. Acad. Sci. U.S.A.* 108, 6999–  
459 7003.
- 460 40. Banjara, S., Suraweera, C.D., Hinds, M.G., and Kvansakul, M. (2020). The Bcl-2 Family: Ancient  
461 Origins, Conserved Structures, and Divergent Mechanisms. *Biomolecules* 10.
- 462 41. Kalkavan, H., and Green, D.R. (2018). MOMP, cell suicide as a BCL-2 family business. *Cell Death*  
463 *Differ* 25, 46–55.
- 464 42. Dunn, S.R., Phillips, W.S., Spatafora, J.W., Green, D.R., and Weis, V.M. (2006). Highly conserved  
465 caspase and Bcl-2 homologues from the sea anemone *Aiptasia pallida*: lower metazoans as  
466 models for the study of apoptosis evolution. *J. Mol. Evol.* 63, 95–107.
- 467 43. Clavier, A., Rincheval-Arnold, A., Colin, J., Mignotte, B., and Guénal, I. (2016). Apoptosis in  
468 *Drosophila*: which role for mitochondria? *Apoptosis* 21, 239–251.
- 469 44. Abdelwahid, E., Yokokura, T., Krieser, R.J., Balasundaram, S., Fowle, W.H., and White, K. (2007).  
470 Mitochondrial disruption in *Drosophila* apoptosis. *Dev Cell* 12, 793–806.
- 471 45. Krumschnabel, G., Sohm, B., Bock, F., Manzl, C., and Villunger, A. (2009). The enigma of caspase-  
472 2: the laymen’s view. *Cell Death & Differentiation* 16, 195–207.
- 473 46. Olsson, M., Forsberg, J., and Zhivotovsky, B. (2015). Caspase-2: the reinvented enzyme.  
474 *Oncogene* 34, 1877–1882.
- 475 47. Lassus, P., Opitz-Araya, X., and Lazebnik, Y. (2002). Requirement for caspase-2 in stress-induced  
476 apoptosis before mitochondrial permeabilization. *Science* 297, 1352–1354.
- 477 48. Zhivotovsky, B., and Orrenius, S. (2005). Caspase-2 function in response to DNA damage.  
478 *Biochem. Biophys. Res. Commun.* 331, 859–867.
- 479 49. Krumschnabel, G., Manzl, C., and Villunger, A. (2009). Caspase-2: killer, savior and safeguard--  
480 emerging versatile roles for an ill-defined caspase. *Oncogene* 28, 3093–3096.
- 481 50. Olsson, M., Vakifahmetoglu, H., Abruzzo, P.M., Högstrand, K., Grandien, A., and Zhivotovsky, B.  
482 (2009). DISC-mediated activation of caspase-2 in DNA damage-induced apoptosis. *Oncogene* 28,  
483 1949–1959.
- 484 51. Lavrik, I.N., Golks, A., Baumann, S., and Krammer, P.H. (2006). Caspase-2 is activated at the CD95  
485 death-inducing signaling complex in the course of CD95-induced apoptosis. *Blood* 108, 559–565.
- 486 52. Braga, M., Sinha Hikim, A.P., Datta, S., Ferrini, M.G., Brown, D., Kovacheva, E.L., Gonzalez-  
487 Cadavid, N.F., and Sinha-Hikim, I. (2008). Involvement of oxidative stress and caspase 2-mediated

- 488 intrinsic pathway signaling in age-related increase in muscle cell apoptosis in mice. *Apoptosis* *13*,  
489 822–832.
- 490 53. Duan, H., and Dixit, V.M. (1997). RAIDD is a new “death” adaptor molecule. *Nature* *385*, 86–89.
- 491 54. Tinel, A., and Tschopp, J. (2004). The PIDDosome, a protein complex implicated in activation of  
492 caspase-2 in response to genotoxic stress. *Science* *304*, 843–846.
- 493 55. Haupt, S., Berger, M., Goldberg, Z., and Haupt, Y. (2003). Apoptosis - the p53 network. *J Cell Sci*  
494 *116*, 4077–4085.
- 495 56. Force, A., Lynch, M., Pickett, F.B., Amores, A., Yan, Y.L., and Postlethwait, J. (1999). Preservation  
496 of duplicate genes by complementary, degenerative mutations. *Genetics* *151*, 1531–1545.
- 497 57. Conant, G.C., and Wolfe, K.H. (2008). Turning a hobby into a job: how duplicated genes find new  
498 functions. *Nat Rev Genet* *9*, 938–950.
- 499 58. Fares, M.A., Keane, O.M., Toft, C., Carretero-Paulet, L., and Jones, G.W. (2013). The roles of  
500 whole-genome and small-scale duplications in the functional specialization of *Saccharomyces*  
501 *cerevisiae* genes. *PLoS Genet* *9*, e1003176.
- 502 59. Degterev, A., Boyce, M., and Yuan, J. (2003). A decade of caspases. *Oncogene* *22*, 8543–8567.
- 503 60. Mancini, M., Machamer, C.E., Roy, S., Nicholson, D.W., Thornberry, N.A., Casciola-Rosen, L.A.,  
504 and Rosen, A. (2000). Caspase-2 Is Localized at the Golgi Complex and Cleaves Golgin-160 during  
505 Apoptosis. *J Cell Biol* *149*, 603–612.
- 506 61. Kumar, S., and Doumanis, J. (2000). The fly caspases. *Cell Death Differ* *7*, 1039–1044.
- 507 62. Ouyang, Y., Petritsch, C., Wen, H., Jan, L., Jan, Y.N., and Lu, B. (2011). Dronc caspase exerts a non-  
508 apoptotic function to restrain phospho-Numb-induced ectopic neuroblast formation in  
509 *Drosophila*. *Development* *138*, 2185–2196.
- 510 63. Huh, J.R., Guo, M., and Hay, B.A. (2004). Compensatory proliferation induced by cell death in the  
511 *Drosophila* wing disc requires activity of the apical cell death caspase Dronc in a nonapoptotic  
512 role. *Curr. Biol.* *14*, 1262–1266.
- 513 64. Vogeler, S., Carboni, S., Li, X., and Joyce, A. (2021). Phylogenetic analysis of the caspase family in  
514 bivalves: implications for programmed cell death, immune response and development. *BMC*  
515 *Genomics* *22*, 80.
- 516 65. Pirger, Z., Rácz, B., and Kiss, T. (2009). Dopamine-induced programmed cell death is associated  
517 with cytochrome c release and caspase-3 activation in snail salivary gland cells. *Biol. Cell* *101*,  
518 105–116.
- 519 66. Romero, A., Estévez-Calvar, N., Dios, S., Figueras, A., and Novoa, B. (2011). New insights into the  
520 apoptotic process in mollusks: characterization of caspase genes in *Mytilus galloprovincialis*.  
521 *PLoS ONE* *6*, e17003.
- 522 67. Zhang, L., Li, L., and Zhang, G. (2011). Gene discovery, comparative analysis and expression  
523 profile reveal the complexity of the *Crassostrea gigas* apoptosis system. *Dev. Comp. Immunol.*  
524 *35*, 603–610.

- 525 68. Yang, B., Li, L., Pu, F., You, W., Huang, H., and Ke, C. (2015). Molecular cloning of two molluscan  
526 caspases and gene functional analysis during *Crassostrea angulata* (Fujian oyster) larval  
527 metamorphosis. *Mol. Biol. Rep.* *42*, 963–975.
- 528 69. Plachetzki, D.C., Pankey, M.S., MacManes, M.D., Lesser, M.P., and Walker, C.W. (2020). The  
529 Genome of the Softshell Clam *Mya arenaria* and the Evolution of Apoptosis. *Genome Biol Evol*  
530 *12*, 1681–1693.
- 531 70. Piquet, B., Shillito, B., Lallier, F.H., Duperron, S., and Andersen, A.C. (2019). High rates of  
532 apoptosis visualized in the symbiont-bearing gills of deep-sea *Bathymodiolus* mussels. *PLoS ONE*  
533 *14*, e0211499.
- 534 71. Sokolova, I.M., Evans, S., and Hughes, F.M. (2004). Cadmium-induced apoptosis in oyster  
535 hemocytes involves disturbance of cellular energy balance but no mitochondrial permeability  
536 transition. *J. Exp. Biol.* *207*, 3369–3380.
- 537 72. Sokolova, I.M. (2009). Apoptosis in molluscan immune defense. *Invertebrate Survival Journal* *6*,  
538 49–58.
- 539 73. An, H.-K., Chung, K.M., Park, H., Hong, J., Gim, J.-E., Choi, H., Lee, Y.W., Choi, J., Mun, J.Y., and Yu,  
540 S.-W. (2020). CASP9 (caspase 9) is essential for autophagosome maturation through regulation of  
541 mitochondrial homeostasis. *Autophagy* *16*, 1598–1617.
- 542 74. Madadi, Z., Akbari-Birgani, S., Monfared, P.D., and Mohammadi, S. (2019). The non-apoptotic  
543 role of caspase-9 promotes differentiation in leukemic cells. *Biochim Biophys Acta Mol Cell Res*  
544 *1866*, 118524.
- 545 75. Hollville, E., and Deshmukh, M. (2018). Physiological functions of non-apoptotic caspase activity  
546 in the nervous system. *Semin Cell Dev Biol* *82*, 127–136.
- 547 76. Tran, H.T., Fransen, M., Dimitrakopoulou, D., Van Imschoot, G., Willemarck, N., and Vleminckx, K.  
548 (2017). Caspase-9 has a nonapoptotic function in *Xenopus* embryonic primitive blood formation.  
549 *J Cell Sci* *130*, 2371–2381.
- 550 77. Tamura, R., Takada, M., Sakaue, M., Yoshida, A., Ohi, S., Hirano, K., Hayakawa, T., Hirohashi, N.,  
551 Yura, K., and Chiba, K. (2018). Starfish Apaf-1 activates effector caspase-3/9 upon apoptosis of  
552 aged eggs. *Sci Rep* *8*, 1611.
- 553 78. Belyi, V.A., Ak, P., Markert, E., Wang, H., Hu, W., Puzio-Kuter, A., and Levine, A.J. (2010). The  
554 origins and evolution of the p53 family of genes. *Cold Spring Harb Perspect Biol* *2*, a001198.
- 555 79. Lu, W.-J., Amatruda, J.F., and Abrams, J.M. (2009). p53 ancestry: gazing through an evolutionary  
556 lens. *Nat Rev Cancer* *9*, 758–762.
- 557 80. Berthelet, J., and Dubrez, L. (2013). Regulation of Apoptosis by Inhibitors of Apoptosis (IAPs).  
558 *Cells* *2*, 163–187.
- 559 81. Ribeiro Lopes, M., Parisot, N., Callaerts, P., and Calevro, F. (2019). Genetic Diversity of the  
560 Apoptotic Pathway in Insects. In *Evolution, Origin of Life, Concepts and Methods*, P. Pontarotti,  
561 ed. (Springer International Publishing), pp. 253–285.

- 562 82. Ribeiro Lopes, M., Parisot, N., Gaget, K., Huygens, C., Peignier, S., Duport, G., Orleans, J., Charles,  
563 H., Baatsen, P., Jousselin, E., et al. (2020). Evolutionary novelty in the apoptotic pathway of  
564 aphids. *Proc Natl Acad Sci U S A* *117*, 32545–32556.
- 565 83. Aubrey, B.J., Janic, A., Chen, Y., Chang, C., Lieschke, E.C., Diepstraten, S.T., Kueh, A.J., Bernardini,  
566 J.P., Dewson, G., O’Reilly, L.A., et al. (2018). Mutant TRP53 exerts a target gene-selective  
567 dominant-negative effect to drive tumor development. *Genes Dev* *32*, 1420–1429.
- 568 84. Aubrey, B.J., Kelly, G.L., Janic, A., Herold, M.J., and Strasser, A. (2018). How does p53 induce  
569 apoptosis and how does this relate to p53-mediated tumour suppression? *Cell Death Differ* *25*,  
570 104–113.
- 571 85. Gattiker, A., Gasteiger, E., and Bairoch, A. (2002). ScanProsite: a reference implementation of a  
572 PROSITE scanning tool. *Appl Bioinformatics* *1*, 107–108.
- 573 86. Quevillon, E., Silventoinen, V., Pillai, S., Harte, N., Mulder, N., Apweiler, R., and Lopez, R. (2005).  
574 InterProScan: protein domains identifier. *Nucleic Acids Res* *33*, W116-120.
- 575 87. Katoh, K., and Standley, D.M. (2013). MAFFT multiple sequence alignment software version 7:  
576 improvements in performance and usability. *Mol. Biol. Evol.* *30*, 772–780.
- 577 88. Sievers, F., Wilm, A., Dineen, D., Gibson, T.J., Karplus, K., Li, W., Lopez, R., McWilliam, H.,  
578 Remmert, M., Söding, J., et al. (2011). Fast, scalable generation of high-quality protein multiple  
579 sequence alignments using Clustal Omega. *Mol. Syst. Biol.* *7*, 539.
- 580 89. HALL, T.A. (1999). BioEdit : a user-friendly biological sequence alignment editor and analysis  
581 program for Windows 95/98/NT. *Nucleic Acids Symp. Ser.* *41*, 95–98.
- 582 90. Castresana, J. (2000). Selection of conserved blocks from multiple alignments for their use in  
583 phylogenetic analysis. *Mol. Biol. Evol.* *17*, 540–552.
- 584 91. Guindon, S., Dufayard, J.-F., Lefort, V., Anisimova, M., Hordijk, W., and Gascuel, O. (2010). New  
585 algorithms and methods to estimate maximum-likelihood phylogenies: assessing the  
586 performance of PhyML 3.0. *Syst. Biol.* *59*, 307–321.
- 587 92. Gouy, M., Guindon, S., and Gascuel, O. (2010). SeaView version 4: A multiplatform graphical user  
588 interface for sequence alignment and phylogenetic tree building. *Mol Biol Evol* *27*, 221–224.
- 589 93. Tamura, K., Stecher, G., and Kumar, S. (2021). MEGA11: Molecular Evolutionary Genetics  
590 Analysis Version 11. *Mol Biol Evol* *38*, 3022–3027.
- 591 94. Ronquist, F., and Huelsenbeck, J.P. (2003). MrBayes 3: Bayesian phylogenetic inference under  
592 mixed models. *Bioinformatics* *19*, 1572–1574.

593  
594  
595  
596  
597

598

599

600

601

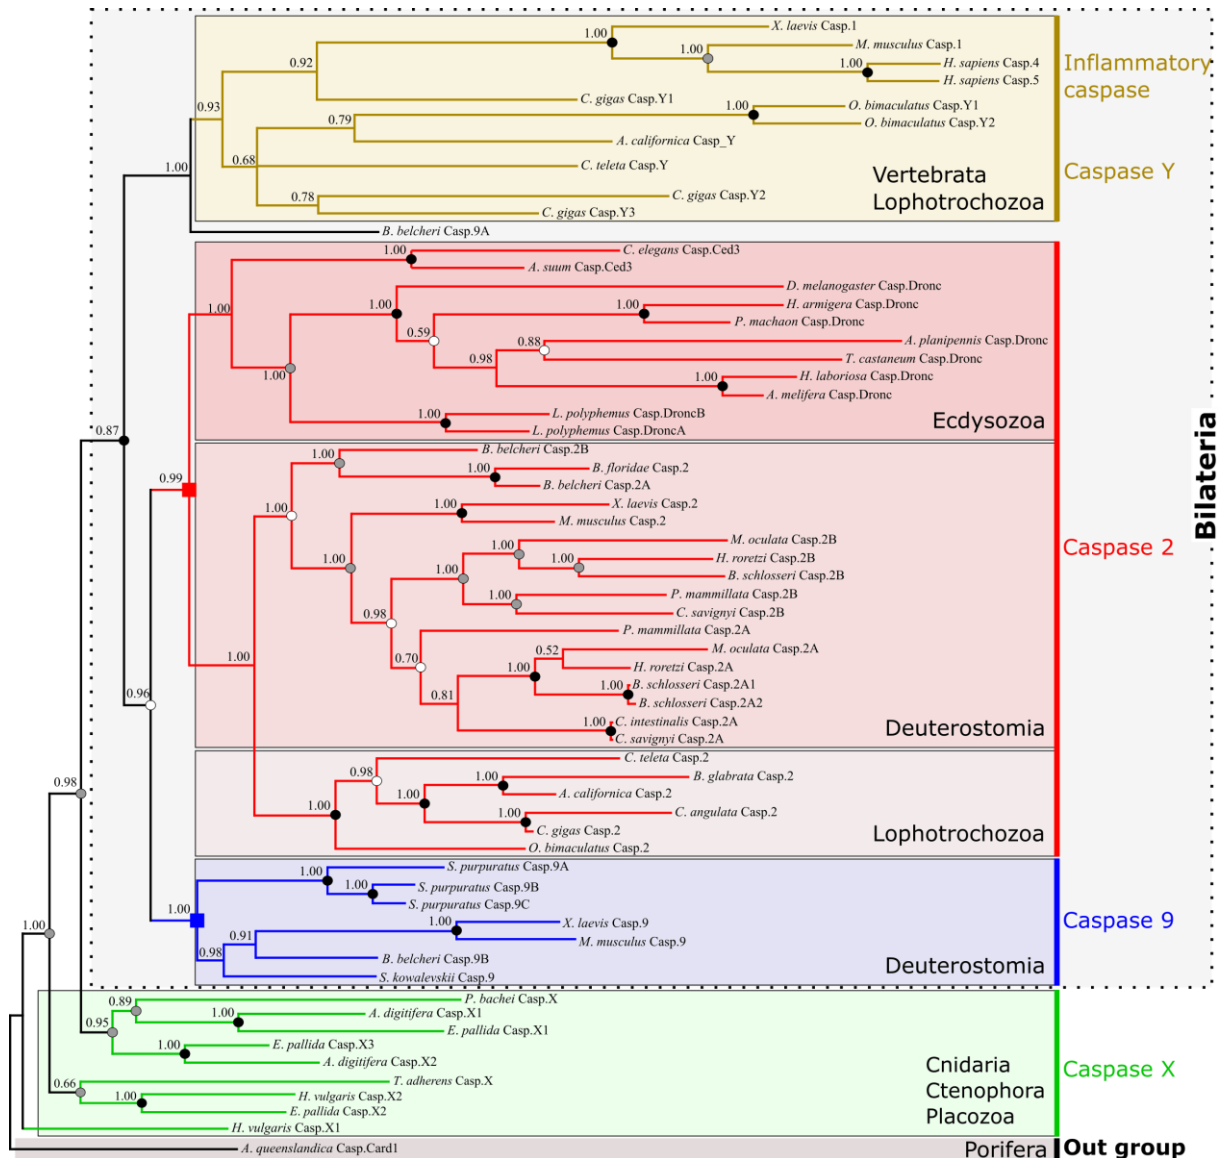

Bayesian posterior probabilities 0 to 1.00

● ML Bootstrap >90

● ML Bootstrap 70-90

○ ML Bootstrap 50-70

602

603 **Figure 1:**

604 Topology of metazoan CARD-caspases phylogeny obtained by Bayesian inference. Maximum

605 likelihood method produces same topology. Three strongly supported monophyletic groups

606 are identified: caspase-9, caspase-2 and a more heterogeneous group named here

607 [Inflammatory Caspases + Caspase-Y]. Together they form a clade strictly corresponding to

608 bilaterian animals. Caspase-2 is widely distributed among bilaterians [Deutostomia +  
609 Ecdysozoa + Lophotrochozoa/Spiralia] reflecting an ancestral origin. Conversely, caspase-9 is  
610 strictly restricted to deuterostomian animals. Sequences of non-bilaterians (Cnidaria +  
611 Ctenophora + Placozoa) form divergent paraphyletic groups. We used as outgroup the unique  
612 CARD-caspase of the Porifera *Amphimedon queenslandica* (XP\_003383519).

613

614

615

616

617

618

619

620

621

622

623

624

625

626

627

628

629

630

631

632

633

634



635

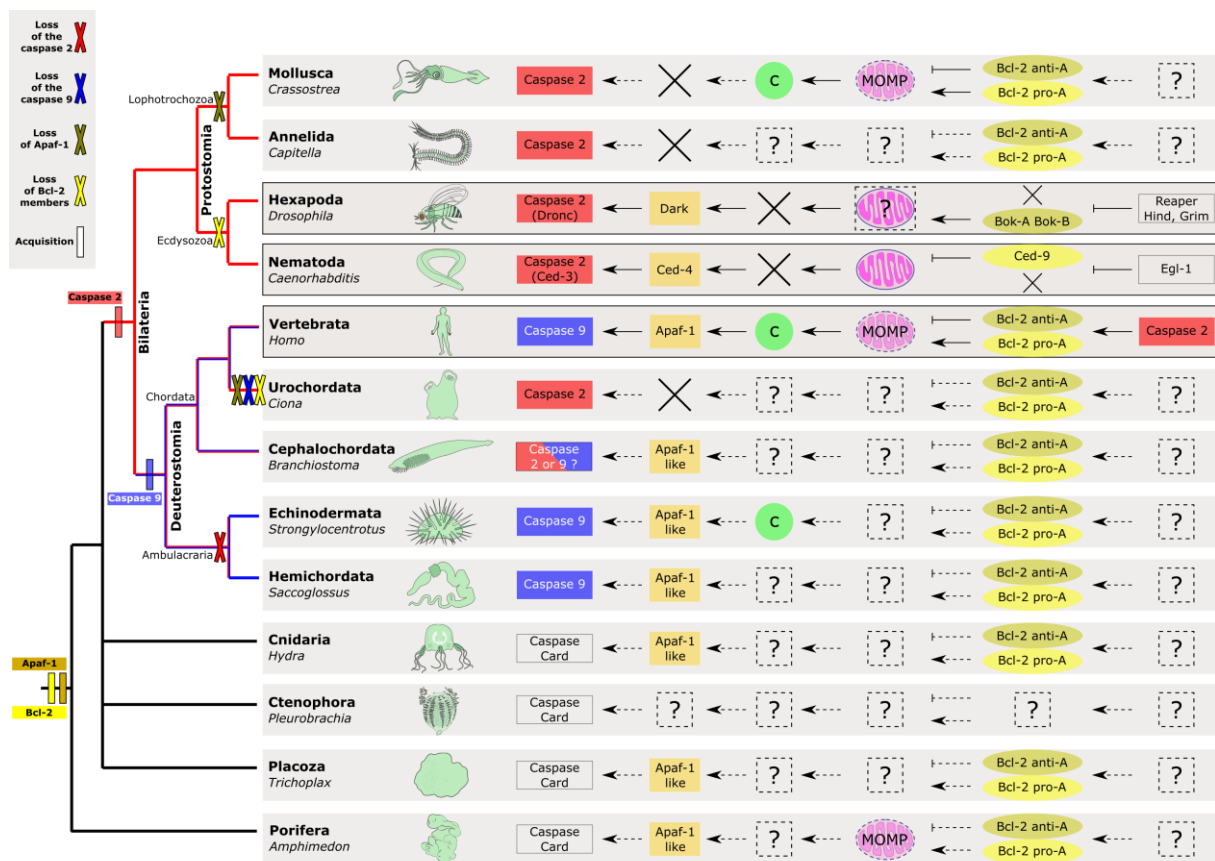

636

637

638 **Figure 2:**

639 Reconstruction of convergent hypothetical intrinsic apoptotic pathways among metazoans  
 640 according to molecular actors detected and identified in their genomes. Variability of intrinsic  
 641 apoptotic pathways among animals emerged from convergences and recruitment of distinct  
 642 actors having independent evolutionary history. Caspase-2 is bilaterian-specific and the  
 643 initiator of ecdysozoans intrinsic apoptosis. Caspase-9 is restricted to deuterostomes and the  
 644 specific initiator of mammalian intrinsic apoptosis. Deuterostomes exhibit several losses (i.e.  
 645 caspase 2 in cephalochordates, caspase 9 in urochordates) or duplication (i.e. caspase 9 in  
 646 echinoderms), highlighting a putative evolutionary flexibility in apoptotic pathways  
 647 establishment. Mitochondrial functions diverge among phyla and cytochrome c release thanks  
 648 to the mitochondrial outer membrane permeabilisation (MOMP) is only specific to mammals

649 and possibly echinoderms. The convergent evolutionary histories certainly reflect a probable  
650 phylum specific adaptive processes leading to parallel evolution of mitochondrial apoptotic  
651 pathways observed among animals.

652

653

654

655

656

657

658

659

660

661

662

663

664

665

666

667

668

669

670

671

672

673

674

675

676

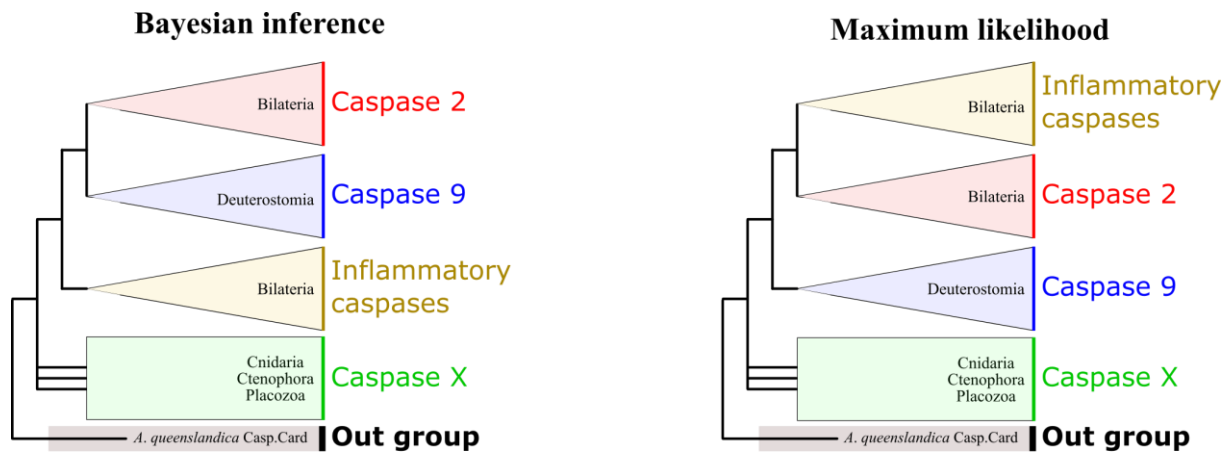

677

678

679 **Supplementary Figure 1:**

680 Monophyly of each CARD-caspase group is conserved using Bayesian inference and maximum  
681 likelihood analyses. Caspase-9, caspase-2 and [Inflammatory Caspases + Caspase-Y] groups  
682 remain conserved, confirming the bilaterian-specificity of caspase-2 and deuterostomian-  
683 specificity of caspase-9. Relationships among these three clades differ depending on the  
684 methodology employed. Divergent sequences of non-bilaterians animals (Cnidaria +  
685 Ctenophora + Placozoa) always form a paraphyletic group of caspases.

686

687

688

689

690

691

692

693

694

695

696

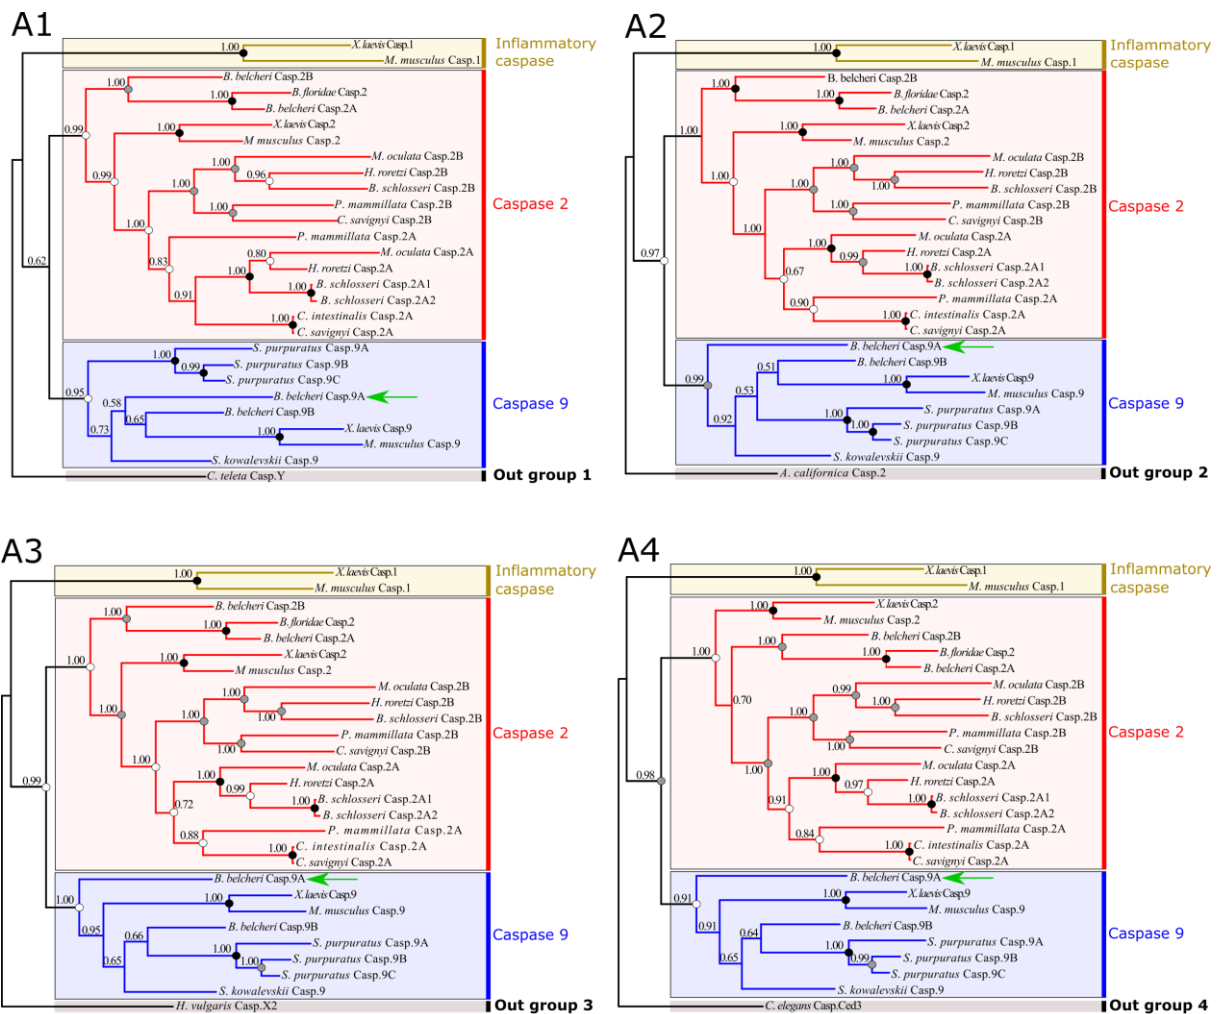

### Nodes robustness

Bayesian posterior probabilities 0 to 1.00

- ML Bootstrap >90
- ML Bootstrap 70-90
- ML Bootstrap 50-70

*B.belcheri* Casp.9A ←

697

### 698 Supplementary Figure 2:

699 Phylogeny of CARD-caspases at the deuterostomian scale. Maximum likelihood and Bayesian  
 700 inference methods produce similar topologies. Despite unstable position of the  
 701 cephalochordate *Branchiostoma belcheri* caspase-9A (green arrow), it unequivocally appears  
 702 to belong to caspase-9 group. Numbers given correspond to posterior probabilities. We used  
 703 respectively as outgroup the *Capitella teleta* caspase-Y (ELT97848.1) (A1), the *Aplysia*

704 *californica* caspase-2 (XP\_005113266) (**A2**), the *Hydra vulgaris* caspase-X2 (NP\_001274285.1)

705 (**A3**), and the *Caenorhabditis elegans* Ced3 (AAG42045.1) (**A4**).

706

707

708

709

710

711

712

713

714

715

716

717

718

719

720

721

722

723

724

725

726

727

728

729

730

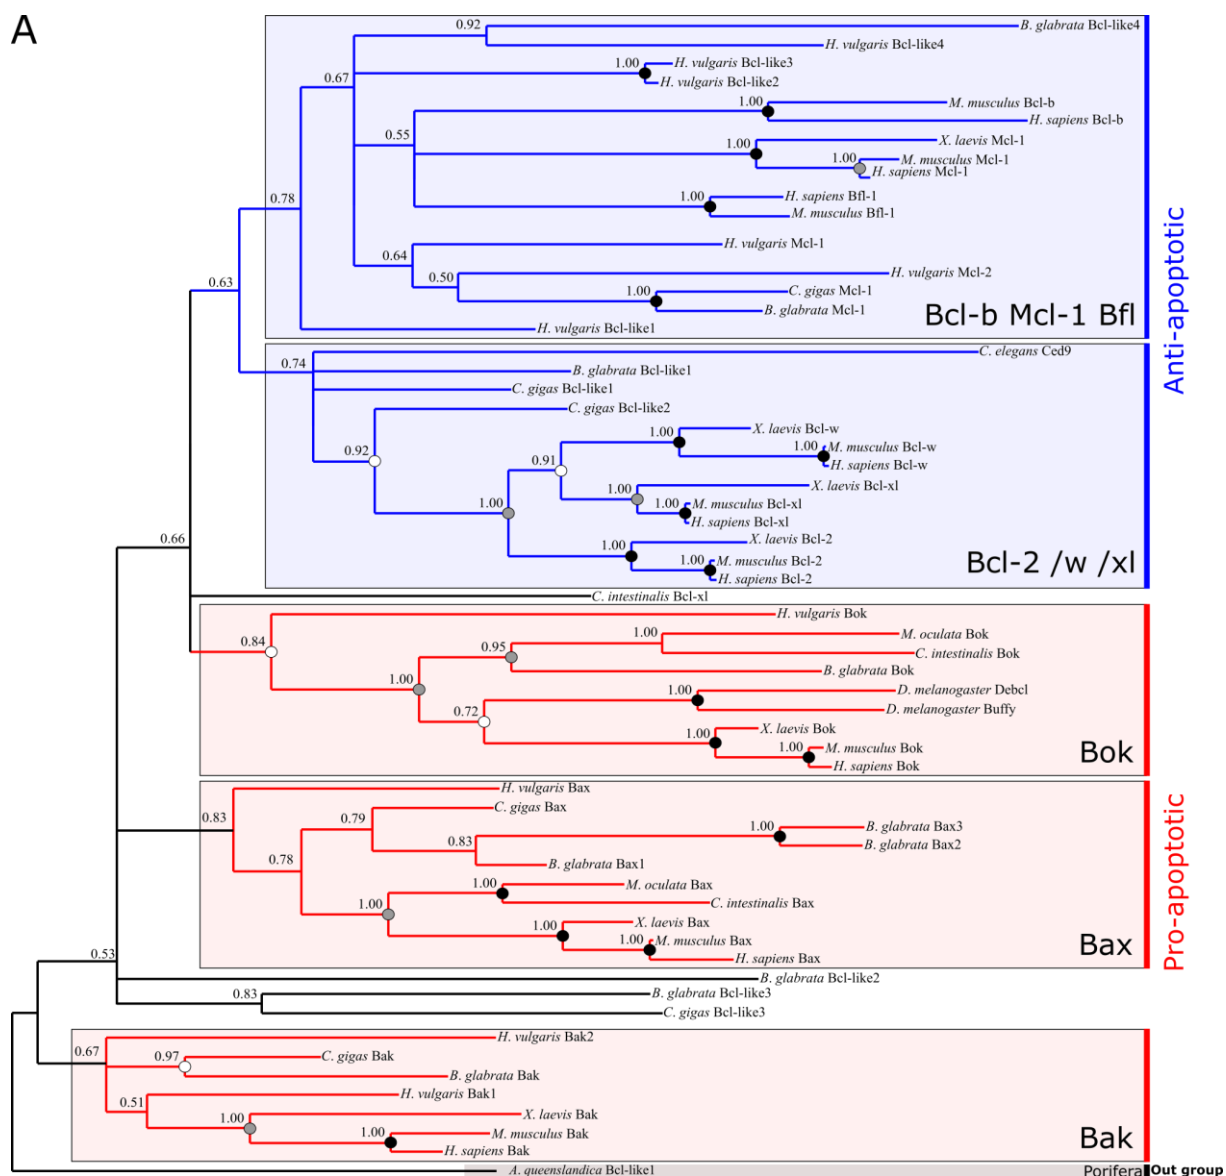

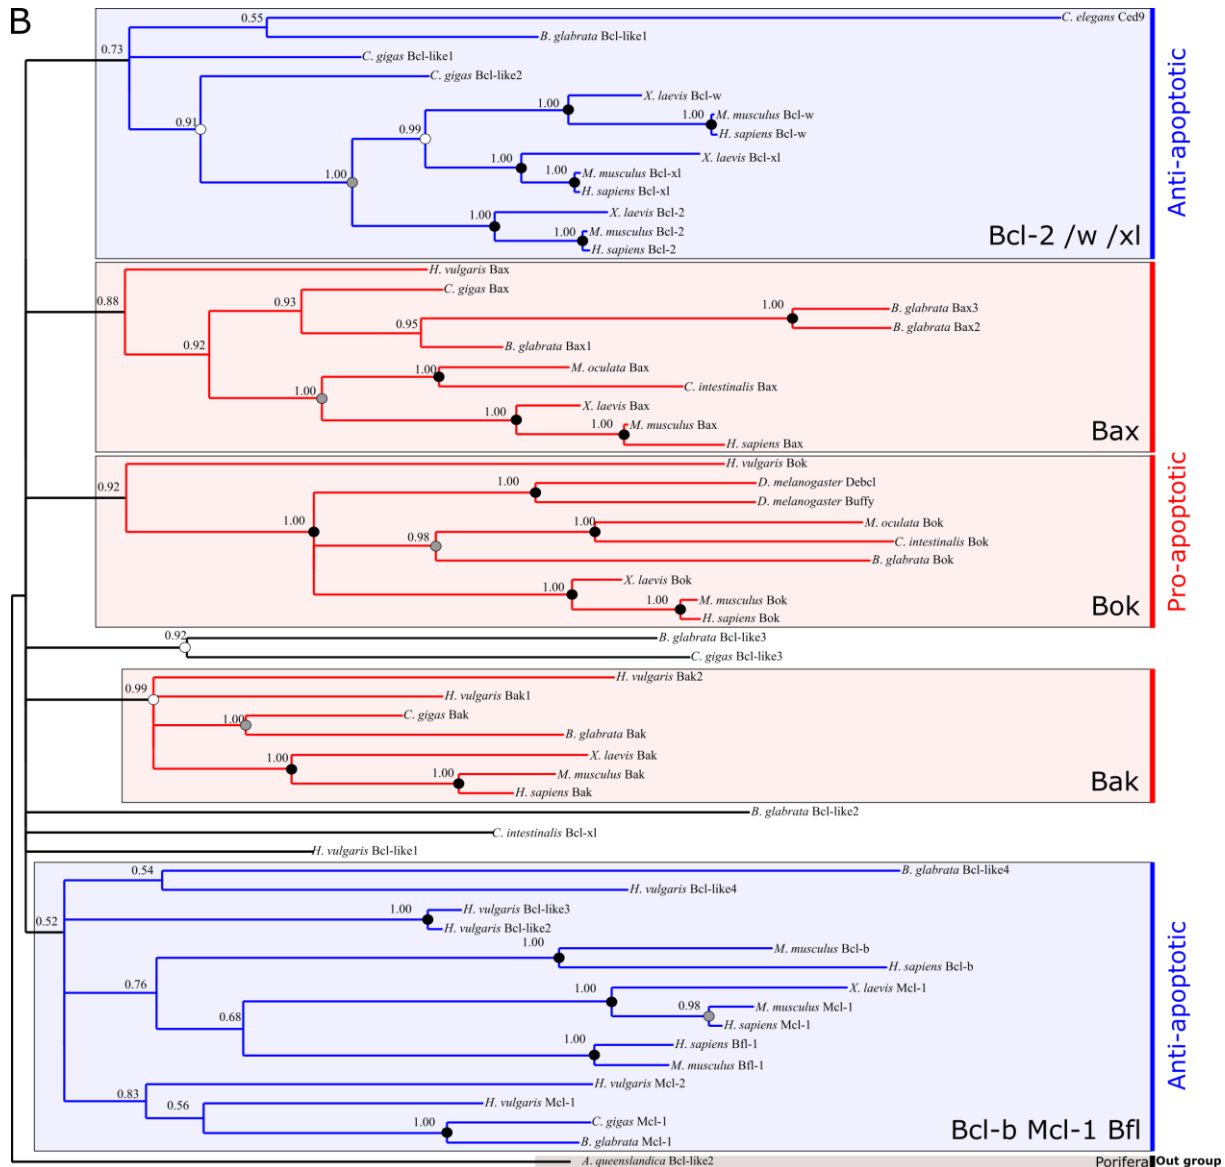

747 among them is not well resolved. Numbers given on branches correspond to posterior  
748 probabilities. We used respectively as outgroup the *Amphimedon queenslandica* Bcl-like 1  
749 (XP\_003383425.1) (**A**), and *Amphimedon queenslandica* Bcl-like 2 (XP\_003387574.1) (**B**).

750

751

752

753

754

755

756

757

758

759

760

761

762

763

764

765

766

767

768

769

770

771



772 Supplemental table 1: List of CARD-caspases used for phylogenetic analysis.

773

|                       | Species                         | Accession number                     | Name        |
|-----------------------|---------------------------------|--------------------------------------|-------------|
| Porifera              | <i>Amphimedon queenslandica</i> | XP_003383519                         | Casp. Card  |
| Cnidaria              | <i>Acropora digitifera</i>      | XP_015766400                         | Casp. X2    |
|                       |                                 | XP_015768208                         | Casp. X1    |
|                       |                                 | KXJ12672.1                           | Casp. X1    |
|                       | <i>Exaiptasia pallida</i>       | KXJ20965.1                           | Casp. X2    |
|                       |                                 | KXJ12683.1                           | Casp. X3    |
|                       |                                 | ACY95435.1                           | Casp. X1    |
| <i>Hydra vulgaris</i> | ACY95436.1                      | Casp. X2                             |             |
|                       | Sb 2658116                      | Casp. X                              |             |
| Ctenophora            | <i>Pleurobrachia bachei</i>     | Sb 2658116                           | Casp. X     |
| Placozoa              | <i>Trochoplax adherens</i>      | RDD44781.1                           | Casp. X     |
| Lophotrocozoa         | <i>Aplysia californica</i>      | XP_005113266                         | Casp. 2     |
|                       |                                 | XP_012945422.1                       | Casp. Y     |
|                       |                                 | XP_013082356.1                       | Casp.       |
|                       | <i>Biomphalaria glabrata</i>    | ELU00616.1                           | Casp. 2     |
|                       |                                 | ELT97848.1                           | Casp. Y     |
|                       | <i>Crassostrea angulata</i>     | AGN75137.1                           | Casp. 2     |
|                       |                                 | XP_011419292                         | Casp. 2     |
|                       | <i>Crassostrea gigas</i>        | XP_011414267                         | Casp. Y1    |
|                       |                                 | XP_011449817                         | Casp. Y3    |
|                       |                                 | XP_011432762                         | Casp. Y2    |
|                       |                                 | XP_014783442.1                       | Casp. 2     |
|                       |                                 | XP_014790087.1                       | Casp. Y1    |
|                       | <i>Octopus bimaculatus</i>      | XP_014784582.1                       | Casp. Y2    |
| XP_013788138.1        |                                 | Casp. 2                              |             |
| XP_013776997.1        |                                 | Casp. 2                              |             |
| Insecta               | <i>Agrius planipennis</i>       | XP_018324425.1                       | Casp. 2     |
|                       |                                 | XP_016771440.1                       | Casp. 2     |
|                       | <i>Apis mellifera</i>           | CAB53565.1                           | Casp. 2     |
|                       |                                 | XP_017788772.1                       | Casp. 2     |
|                       | <i>Habropoda laboriosa</i>      | AEK20835.1                           | Casp. 2     |
|                       |                                 | XP_014362236.1                       | Casp. 2     |
|                       | <i>Papilio machaon</i>          | XP_001813274                         | Casp. 2     |
|                       |                                 | ERG86894.1                           | Casp. 2     |
| Nematoda              | <i>Caenorhabditis elegans</i>   | AAG42045.1                           | Casp. 2     |
|                       |                                 | AAH17839.1                           | Casp. 4     |
| Vertebrata            | <i>Homo sapiens</i>             | AAI13407.1                           | Casp. 5     |
|                       |                                 | NP_033937.2                          | Casp. 1     |
|                       | <i>Mus musculus</i>             | EDL13489.1                           | Casp. 2     |
|                       |                                 | AAH56447.1                           | Casp. 9     |
|                       | <i>Xenopus laevis</i>           | NP_001081223.1                       | Casp. 1     |
|                       |                                 | NP_001081404.1                       | Casp. 2     |
|                       |                                 | NP_001079035.1                       | Casp. 9     |
|                       | Echinodermata                   | <i>Strongylocentrotus purpuratus</i> | XP_789183.3 |
| XP_011661242.1 1      |                                 |                                      | Casp. 9B    |

|                 |                                 |                                           |           |
|-----------------|---------------------------------|-------------------------------------------|-----------|
|                 |                                 | XP_011661359.1                            | Casp. 9C  |
| Hemichordata    | <i>Saccoglossus kowalevskii</i> | XP_006811879.1                            | Casp. 9   |
| Cephalochordata | <i>Branchiostoma belcheri</i>   | XP_019646757.1                            | Casp. 2A  |
|                 |                                 | XP_019642903.1                            | Casp. 2B  |
|                 |                                 | XP_019623612.1                            | Casp. 9A  |
|                 |                                 | XP_019644208.1                            | Casp. 9B  |
|                 | <i>Branchiostoma floridae</i>   | EEN68002.1                                | Casp. 2   |
| Urochordata     | <i>Botryllus schlosseri</i>     | Boschl.CG.Botznic2013.chrUn.g02816.01.p   | Casp. 2A1 |
|                 |                                 | Boschl.CG.Botznic2013.chrUn.g08767.01.p   | Casp. 2A2 |
|                 |                                 | Boschl.CG.Botznic2013.chrUn.g09831.01.p   | Casp. 2B  |
|                 | <i>Ciona intestinalis</i>       | KH2012:KH.C4.463.v1.A.ND1-1               | Casp. 2A  |
|                 | <i>Ciona savignyi</i>           | CISAVI-CG-ENS81-R15-461426-463207-09349-P | Casp. 2A  |
|                 |                                 | CISAVI-CG-ENS81-R54-461275-467018-10343-P | Casp. 2B  |
|                 | <i>Molgula oculata</i>          | Moocul-CG-ELv1_2-S113854-g13164-01-p      | Casp. 2A  |
|                 |                                 | Moocul-CG-ELv1_2-S103067-g09526-01-p      | Casp. 2B  |
|                 | <i>Phallusia mammillata</i>     | PHMAMM-CG-MTP2014-S310-G07060-01-P        | Casp. 2A  |
|                 |                                 | PHMAMM-CG-MTP2014-S92-G02989-01-P         | Casp. 2B  |
|                 | <i>Halocynthia roretzi</i>      | HARORE-CG-MTP2014-S35-G03390-01-P         | Casp. 2A  |
|                 |                                 | HARORE-CG-MTP2014-S130-G07320-01-P        | Casp. 2B  |

774

775

776

777

778

779

780

781

782

783

784

785

786

787

788

789 Supplemental Table 2: List of Apaf-1 among metazoans. N/A: No APAF-1 has been identified.  
790

|                            | Species                              | Accession number                                   |
|----------------------------|--------------------------------------|----------------------------------------------------|
| Porifera                   | <i>Amphimedon queenslandica</i>      | XP_019855714.1                                     |
| Ctenophora                 | <i>Pleurobrachia bachei</i>          | N/A                                                |
| Placozoa                   | <i>Trichoplax sp.</i>                | RDD40813.1                                         |
| Cnidaria                   | <i>Acropora digitifera</i>           | XP_015776356.1                                     |
|                            | <i>Exaiptasia pallida</i>            | KXJ17575.1                                         |
|                            | <i>Hydra vulgaris</i>                | CDG72123.1                                         |
| Nematoda                   | <i>Caenorhabditis elegans</i>        | CAA48781.1                                         |
| Chelicerata                | <i>Limulus polyphemus</i>            | XP_022244405.1<br>XP_022249946.1                   |
| Insecta                    | <i>Agrilus planipennis</i>           | XP_025834330.1                                     |
|                            | <i>Apis mellifera</i>                | XP_026298102.1                                     |
|                            | <i>Drosophila melanogaster</i>       | NP_725637.1                                        |
|                            | <i>Habropoda laboriosa</i>           | XP_017794472.1                                     |
|                            | <i>Helicoverpa armigera</i>          | XP_021181657.1                                     |
|                            | <i>Papilio machaon</i>               | XP_014359375.1                                     |
|                            | <i>Tribolium castaneum</i>           | XP_015840766.1                                     |
|                            | <i>Aplysia californica</i>           | N/A                                                |
|                            | <i>Biomphalaria glabrata</i>         | N/A                                                |
|                            | Lophotrocozoa                        | <i>Crassostrea angulata</i>                        |
| <i>Crassostrea gigas</i>   |                                      | N/A                                                |
| <i>Octopus bimaculatus</i> |                                      | N/A                                                |
| <i>Capitella teleta</i>    |                                      | N/A                                                |
| Vertebrata                 | <i>Homo sapiens</i>                  | NP_863658.1                                        |
|                            | <i>Mus musculus</i>                  | NP_033814.2                                        |
|                            | <i>Xenopus laevis</i>                | NP_001085834.1                                     |
| Echinodermata              | <i>Strongylocentrotus purpuratus</i> | XP_011682983.1<br>XP_011680781.1<br>XP_011680779.1 |
| Hemichordata               | <i>Saccoglossus kowalevskii</i>      | XP_006818297.1                                     |
| Cephalochordata            | <i>Branchiostoma belcheri</i>        | XP_019621685.1                                     |
|                            | <i>Branchiostoma floridae</i>        | XP_035681983.1<br>XP_035678916.1                   |
| Urochordata                | <i>Botryllus schlosseri</i>          | N/A                                                |
|                            | <i>Ciona intestinalis</i>            | N/A                                                |
|                            | <i>Ciona savignyi</i>                | N/A                                                |
|                            | <i>Molgula oculata</i>               | N/A                                                |
|                            | <i>Phallusia mammillata</i>          | N/A                                                |
|                            | <i>Halocynthia roretzi</i>           | N/A                                                |

791  
792  
793

794

795

796 Supplemental table 3: List of Bcl-2 used for phylogenetic analysis.  
797

|               | Species                         | Accession number         | Names          |              |
|---------------|---------------------------------|--------------------------|----------------|--------------|
| Porifera      | <i>Amphimedon queenslandica</i> | XP_003383425.1           | Bcl-2 like 1   |              |
|               |                                 | XP_003387574.1           | Bcl-2 like 2   |              |
| Cnidaria      | <i>Hydra vulgaris</i>           | EF104645                 | Bak 1          |              |
|               |                                 | EU035760                 | Bak 2          |              |
|               |                                 | XP_012562061.1           | Bax            |              |
|               |                                 | EU035764                 | Bcl-2 like 1   |              |
|               |                                 | EF104646                 | Bcl-2 like 2   |              |
|               |                                 | EU035765                 | Bcl-2 like 3   |              |
|               |                                 | EU035763                 | Bcl-2 like 4   |              |
|               |                                 | EU035761                 | Bok            |              |
|               |                                 | EF104647                 | Mcl-1 1        |              |
|               |                                 | EU035762                 | Mcl-1 2        |              |
| Nematoda      | <i>Caenorhabditis elegans</i>   | AAA20080.1               | Ced-9          |              |
| Insecta       | <i>Drosophila melanogaster</i>  | AAF44120.1               | Buffy (Bok-1)  |              |
|               |                                 | AAF26289.1               | Buffy (Bok-2)  |              |
| Lophotrocozoa | <i>Biomphalaria glabrata</i>    | XP_013085524.1           | Bax 1          |              |
|               |                                 | XP_013096338_1           | Bax 2          |              |
|               |                                 | XP_013086802.1           | Bax 3          |              |
|               |                                 | XP_013070177.1           | Bak            |              |
|               |                                 | XP_013081872.1           | Bcl-2 like 1   |              |
|               |                                 | XP_013093137.1           | Bcl-2 like 2   |              |
|               |                                 | XP_013068612.1           | Bcl-2 like 3   |              |
|               |                                 | XP_013083436.1           | Bcl-2 like 4   |              |
|               |                                 | XP_013069706.1           | Bok            |              |
|               |                                 | XP_013065969.1           | Mcl-1          |              |
|               |                                 | <i>Crassostrea gigas</i> | XP_011424481_1 | Bax          |
|               |                                 |                          | XP_011439700_1 | Bak          |
|               |                                 |                          | XP_011449013_1 | Bcl-2 like 1 |
|               |                                 |                          | ACH42081_1     | Bcl-2 like 2 |
|               |                                 |                          | EKC18663_1     | Bcl-2 like 3 |
|               |                                 |                          | XP_011436990_1 | Mcl-1 1      |
|               |                                 |                          | EKC40007_1     | Mcl-1 2      |
|               |                                 |                          |                |              |
| Vertebrata    | <i>Homo sapiens</i>             | AAA74466.1               | Bak            |              |
|               |                                 | NP_001278357.1           | Bax            |              |
|               |                                 | API71171.1               | Bcl-2          |              |
|               |                                 | AAK48715.1               | Bcl-B          |              |
|               |                                 | AAB09055.1               | Bcl-w          |              |
|               |                                 | CAA80661.1               | Bcl-xL         |              |
|               |                                 | NP_004040.1              | Bfl-1          |              |
|               |                                 | NP_115904.1              | Bok            |              |
|               |                                 | AAF64255.1               | Mcl-1          |              |
|               |                                 | <i>Mus musculus</i>      | NP_031549.2    | Bak          |
|               |                                 |                          | NP_031553.1    | Bax          |
|               |                                 |                          | AAH95964.1     | Bcl-2        |
|               |                                 |                          |                |              |

|             |                           |                                      |        |
|-------------|---------------------------|--------------------------------------|--------|
|             |                           | Q9Z0F3.1                             | Bcl-B  |
|             |                           | AAA51039.1                           | Bcl-xL |
|             |                           | AAB09056.1                           | Bcl-w  |
|             |                           | Q07440.1                             | Bfl-1  |
|             |                           | NP_058058.1                          | Bok    |
|             |                           | NP_032588.1                          | Mcl-1  |
|             | <i>Xenopus laevis</i>     | NP_001089587.1                       | Bak    |
|             |                           | AAR84081.1                           | Bax    |
|             |                           | BAH28834.1                           | Bcl-2  |
|             |                           | AAI10791.1                           | Bcl-xl |
|             |                           | XP_018089640.1                       | Bcl-w  |
|             |                           | NP_001139563.1                       | Bok    |
|             |                           | ACI47310.1                           | Mcl-1  |
| Urochordata | <i>Ciona intestinalis</i> | KH2012:KH.C4.794.v1.A.SL1-1          | Bax    |
|             |                           | KH2012:KH.S653.2.v2.A.SL1-1          | Bcl-xl |
|             |                           | KH2012:KHL87.39.v1.A.ND1-1           | Bok    |
|             | <i>Molgula oculata</i>    | Moocul.CG.ELv1_2.S96550.g08147.01.p  | Bax    |
|             |                           | Moocul.CG.ELv1_2.S112899.g12639.01.p | Bok    |

798

799

800

801

802

803

804

805

806

807

808

809

810

811

812

813

814

815

816

817

818 **KEY RESOURCES TABLE**

| Software and Algorithms |                                             |                                                                                                                                       |
|-------------------------|---------------------------------------------|---------------------------------------------------------------------------------------------------------------------------------------|
| ScanProsite             | Gattiker et al., 2002 <sup>85</sup>         | <a href="https://prosite.expasy.org/scanprosite/">https://prosite.expasy.org/scanprosite/</a>                                         |
| InterProScan            | Quevillon et al., 2005 <sup>86</sup>        | <a href="https://www.ebi.ac.uk/interpro/search/sequence/">https://www.ebi.ac.uk/interpro/search/sequence/</a>                         |
| MAFFT 7                 | Katoh et Standley, 2013 <sup>87</sup>       | <a href="https://mafft.cbrc.jp/alignment/server/">https://mafft.cbrc.jp/alignment/server/</a>                                         |
| Clusta Omega            | Sievers et al., 2011 <sup>88</sup>          | <a href="https://www.ebi.ac.uk/Tools/msa/clustalo/">https://www.ebi.ac.uk/Tools/msa/clustalo/</a>                                     |
| BioEdit 7.04            | Hall, 1999 <sup>89</sup>                    | <a href="https://bioedit.software.informer.com/7.2/">https://bioedit.software.informer.com/7.2/</a>                                   |
| Gblocks 0.91b           | Castresana, 2000 <sup>90</sup>              | <a href="http://molevol.cmima.csic.es/castresana/Gblocks_server.html">http://molevol.cmima.csic.es/castresana/Gblocks_server.html</a> |
| PhyML 3.1               | Guindon et al., 2005 <sup>91</sup>          | <a href="http://www.atgc-montpellier.fr/phyml/versions.php">http://www.atgc-montpellier.fr/phyml/versions.php</a>                     |
| Seaview                 | Gouy et al., 2010 <sup>92</sup>             | <a href="http://doua.prabi.fr/software/seaview">http://doua.prabi.fr/software/seaview</a>                                             |
| Mega11                  | Tamura et al., 2021 <sup>93</sup>           | <a href="https://www.megasoftware.net/">https://www.megasoftware.net/</a>                                                             |
| MrBayes 3.1.2           | Ronquist et Huelsenbeck, 2003 <sup>94</sup> | <a href="https://nbisweden.github.io/MrBayes/download.html">https://nbisweden.github.io/MrBayes/download.html</a>                     |

819

820
